# Supplementary material for: Outcomes of Pediatric SARS-CoV-2 Omicron Infection vs Influenza and Respiratory Syncytial Virus Infections
Source: PubMed Central journal article supplement (PMC10751651; doi:10.1001/jamapediatrics.2023.5734), 2023-12-26
Supplement: jamapediatr-e235734-s001.pdf [file jamapediatr-e235734-s001.pdf]

## Supplementary Online Content

Hedberg P, Halim LA, Valik JK, Alfvén T, Naucmér P. Pediatric SARS-CoV-2 Omicron infections compared with influenza and respiratory syncytial virus. *JAMA Pediatr.* 2023;177(12.4):e235734.  
doi:10.1001/jamapediatrics.2023.5734

**eTable 1.** Emergency Department *ICD-10* Codes Used for Study Inclusion

**eTable 2.** Inpatient *ICD-10* Codes Used for Classification of Hospital Admission

**eTable 3.** Study Definitions

This supplementary material has been provided by the authors to give readers additional information about their work.

**eTable 1. Emergency department ICD-10 codes used for study inclusion**

| <b>ICD-10 diagnosis code</b> | <b>Diagnosis name</b>                                                             |
|------------------------------|-----------------------------------------------------------------------------------|
| A09.0                        | Other and unspecified gastroenteritis and colitis of infectious origin            |
| A09.9                        | Gastroenteritis and colitis of unspecified origin                                 |
| A41.9                        | Sepsis, unspecified                                                               |
| B34.2                        | Coronavirus infection, unspecified site                                           |
| B34.9                        | Viral infection, unspecified                                                      |
| B97.4                        | Respiratory syncytial virus as the cause of diseases classified to other chapters |
| H65.1                        | Other acute nonsuppurative otitis media                                           |
| H66.0                        | Acute suppurative otitis media                                                    |
| H66.9                        | Otitis media, unspecified                                                         |
| J00.9                        | Acute nasopharyngitis                                                             |
| J01.2                        | Acute ethmoidal sinusitis                                                         |
| J01.4                        | Acute pansinusitis                                                                |
| J01.9                        | Acute sinusitis, unspecified                                                      |
| J02.9                        | Acute pharyngitis, unspecified                                                    |
| J03.0                        | Streptococcal tonsillitis                                                         |
| J03.9                        | Acute tonsillitis, unspecified                                                    |
| J04.0                        | Acute laryngitis                                                                  |
| J04.1                        | Acute tracheitis                                                                  |
| J04.2                        | Acute laryngotracheitis                                                           |
| J05.0                        | Acute obstructive laryngitis                                                      |
| J06.9                        | Acute upper respiratory infection, unspecified                                    |
| J09.9                        | Influenza due to identified zoonotic or pandemic influenza virus                  |
| J10.0                        | Influenza with pneumonia, seasonal influenza virus identified                     |
| J10.1                        | Influenza with other respiratory manifestations, seasonal virus identified        |
| J10.8                        | Influenza with other manifestations, seasonal influenza virus identified          |
| J11.0                        | Influenza with pneumonia, virus not identified                                    |
| J11.1                        | Influenza with other respiratory manifestations, virus not identified             |
| J11.8                        | Influenza with other manifestations, virus not identified                         |
| J12.1                        | Respiratory syncytial virus pneumonia                                             |
| J12.8                        | Other viral pneumonia                                                             |
| J12.9                        | Viral pneumonia, unspecified                                                      |
| J13.9                        | Pneumonia due to <i>S. pneumoniae</i>                                             |
| J15.9                        | Bacterial pneumonia, unspecified                                                  |
| J18.0                        | Bronchopneumonia, unspecified                                                     |
| J18.1                        | Lobar pneumonia, unspecified                                                      |
| J18.9                        | Pneumonia, unspecified                                                            |

---

|        |                                                                                       |
|--------|---------------------------------------------------------------------------------------|
| J20.1  | Acute bronchitis due to <i>Haemophilus influenzae</i>                                 |
| J20.5  | Acute bronchitis due to respiratory syncytial virus                                   |
| J20.6  | Acute bronchitis due to rhinovirus                                                    |
| J20.9  | Acute bronchitis, unspecified                                                         |
| J21.0  | Acute bronchitis due to respiratory syncytial virus                                   |
| J21.8  | Acute bronchiolitis due to other specified organisms                                  |
| J21.9  | Acute bronchitis, unspecified                                                         |
| J22.9  | Unspecified acute lower respiratory infection                                         |
| J39.8  | Other specified diseases of upper respiratory tract                                   |
| J45.1A | Asthma bronchiale, nonallergic asthma, Acute, infectious                              |
| J96.0  | Acute respiratory failure                                                             |
| J96.9  | Respiratory failure, unspecified                                                      |
| J98.7  | Respiratory infections, not elsewhere classified                                      |
| R05.9  | Cough                                                                                 |
| R06.0  | Dyspnoea                                                                              |
| R06.2  | Wheezing                                                                              |
| R06.8  | Other and unspecified abnormalities of breathing                                      |
| R07.4  | Chest pain, unspecified                                                               |
| R09.8  | Other specified symptoms and signs involving the circulatory and respiratory syndrome |
| R11.9  | Nausea and vomiting                                                                   |
| R11.9B | Vomiting                                                                              |
| R23.0  | Cyanosis                                                                              |
| R46.4  | Slowness and poor responsiveness                                                      |
| R50.8  | Other specified fever                                                                 |
| R50.9  | Fever, unspecified                                                                    |
| R53.9  | Malaise and fatigue                                                                   |
| R65.1  | Systemic Inflammatory Response Syndrome of infectious origin with organ failure       |
| U07.1  | COVID-19, virus identified                                                            |
| U07.2  | COVID-19, virus not identified                                                        |
| U08.9  | Personal history of COVID-19, unspecified                                             |
| U10.9  | Multisystem inflammatory syndrome associated with COVID-19, unspecified               |

---

**Abbreviations:** ICD-10=International Statistical Classification of Diseases and Related Health Problems 10th Revision

**eTable 2. Inpatient ICD-10 codes used for classification of hospital admission**

| ICD-10 diagnosis code | Diagnosis name                                                             |
|-----------------------|----------------------------------------------------------------------------|
| A08.4                 | Viral intestinal infection, unspecified                                    |
| A09.0                 | Other and unspecified gastroenteritis and colitis of infectious origin     |
| A09.9                 | Gastroenteritis and colitis of unspecified origin                          |
| A41.0                 | Sepsis due to <i>Staphylococcus aureus</i>                                 |
| A41.9                 | Sepsis, unspecified                                                        |
| B34.9                 | Viral infection, unspecified                                               |
| H66.0                 | Acute suppurative otitis media                                             |
| H66.9                 | Otitis media, unspecified                                                  |
| I40.9                 | Acute myocarditis, unspecified                                             |
| J00.9                 | Acute nasopharyngitis                                                      |
| J01.2                 | Acute ethmoidal sinusitis                                                  |
| J01.4                 | Acute pansinusitis                                                         |
| J01.9                 | Acute sinusitis, unspecified                                               |
| J03.0                 | Streptococcal tonsillitis                                                  |
| J03.9                 | Acute tonsillitis, unspecified                                             |
| J04.0                 | Acute laryngitis                                                           |
| J04.1                 | Acute tracheitis                                                           |
| J04.2                 | Acute laryngotracheitis                                                    |
| J05.0                 | Acute obstructive laryngitis                                               |
| J06.9                 | Acute upper respiratory infection, unspecified                             |
| J10.0                 | Influenza with pneumonia, seasonal influenza virus identified              |
| J10.1                 | Influenza with other respiratory manifestations, seasonal virus identified |
| J10.8                 | Influenza with other manifestations, seasonal influenza virus identified   |
| J11.8                 | Influenza with other manifestations, virus not identified                  |
| J12.1                 | Respiratory syncytial virus pneumonia                                      |
| J12.8                 | Other viral pneumonia                                                      |
| J12.9                 | Viral pneumonia, unspecified                                               |
| J13.9                 | Pneumonia due to <i>S. pneumoniae</i>                                      |
| J15.9                 | Bacterial pneumonia, unspecified                                           |
| J18.0                 | Bronchopneumonia, unspecified                                              |
| J18.1                 | Lobar pneumonia, unspecified                                               |
| J18.9                 | Pneumonia, unspecified                                                     |
| J20.5                 | Acute bronchitis due to respiratory syncytial virus                        |
| J20.6                 | Acute bronchitis due to rhinovirus                                         |
| J20.9                 | Acute bronchitis, unspecified                                              |
| J21.0                 | Acute bronchitis due to respiratory syncytial virus                        |
| J21.1                 | Acute bronchitis due to human metapneumovirus                              |

---

|        |                                                                         |
|--------|-------------------------------------------------------------------------|
| J21.9  | Acute bronchitis, unspecified                                           |
| J45.1A | Asthma bronchiale, nonallergic asthma, Acute, infectious                |
| J96.0  | Acute respiratory failure                                               |
| J96.09 | Acute respiratory failure, unspecified type                             |
| M30.3  | Mucocutaneous lymph node syndrome (Kawasaki)                            |
| R05.9  | Cough                                                                   |
| R06.0  | Dyspnoea                                                                |
| R06.8  | Other and unspecified abnormalities of breathing                        |
| R50.8  | Other specified fever                                                   |
| R50.9  | Fever, unspecified                                                      |
| R56.0  | Febrile convulsions                                                     |
| U07.1  | COVID-19, virus identified                                              |
| U10.9  | Multisystem inflammatory syndrome associated with COVID-19, unspecified |

---

**Abbreviations:** ICD-10=International Statistical Classification of Diseases and Related Health Problems 10th Revision

**eTable 3. Study definitions**

| <b>Variable</b>                  | <b>Missing data</b> | <b>Definition</b>                                                                                                                                                                                                    | <b>Time period</b>                                                                         | <b>Possible values</b> |
|----------------------------------|---------------------|----------------------------------------------------------------------------------------------------------------------------------------------------------------------------------------------------------------------|--------------------------------------------------------------------------------------------|------------------------|
| <b>Study outcomes</b>            |                     |                                                                                                                                                                                                                      |                                                                                            |                        |
| Hospital admission               | No                  | Admission to the hospital any time from day of ED visit and 14 days onwards. Only hospital admissions with an ICD-10 main diagnosis code indicative of a respiratory virus infection were considered (see eTable 2). | 0 to 14 days from day of ED visit                                                          | Yes, No                |
| ICU admission                    | No                  | Admission to the ICU during a hospital admission as defined above.                                                                                                                                                   | Entire hospitalization                                                                     | Yes, No                |
| 30-day all-cause mortality       | No                  | Date of death (of any cause) any time from day of ED visit and 30 days onwards                                                                                                                                       | 0 to 30 days from day of ED visit                                                          | Yes, No                |
| <b>Other collected variables</b> |                     |                                                                                                                                                                                                                      |                                                                                            |                        |
| Sex                              | No                  | Sex of individual                                                                                                                                                                                                    | Birth                                                                                      | Male, Female           |
| Age                              | No                  | Age at ED visit                                                                                                                                                                                                      | Date of ED visit                                                                           | 0 to 17 years          |
| Asthma                           | No                  | <b>ICD-10:</b> J45.X, J46.X                                                                                                                                                                                          | Fourteen days to five years before ED visit                                                | Yes, No                |
| Cancer                           | No                  | <b>ICD-10:</b> All codes from C00.X to C97.X (besides C44.X), Z51.0, Z51.1<br><br><b>KVÅ:</b> DT107, DT108, DT112, DT116, DT135, DV070, DV071, DV134                                                                 | Fourteen days to one year before ED visit<br><br>Fourteen days to one year before ED visit | Yes, No                |
| Cardiac disease                  | No                  | <b>ICD-10:</b> I05.X, I06.X, I07.X, I08.X, I20.X, I21.X, I22.X, I24.X, I25.X, I26.X, I27.X,                                                                                                                          | Fourteen days to five years before ED visit                                                | Yes, No                |

|                                            |    |                                                                                                                                                 |                                              |         |
|--------------------------------------------|----|-------------------------------------------------------------------------------------------------------------------------------------------------|----------------------------------------------|---------|
|                                            |    | I28.X, I34.X, I35.X, I36.X, I37.X, I42.X, I44.X, I45.X, I46.X, I47.X, I48.X, I49.X, I50.X                                                       |                                              |         |
| Chronic kidney disease                     | No | <b>ICD-10:</b> N03.X, N05.X, N07.X, N18.X, N19.X, N25.X, N26.X, N27.X                                                                           | Fourteen days to five years before ED visit  | Yes, No |
|                                            |    | <b>ICD-10:</b> Z49.1, Z49.2 (should be registered at least twelve times during the time period)                                                 | Fourteen days to one year before ED visit    |         |
|                                            |    | <b>ICD-10:</b> Z99.2                                                                                                                            | Fourteen days to one year before ED visit    |         |
|                                            |    | <b>KVÅ:</b> DR016, DR024 (should be registered at least twelve times during the time period)                                                    | Fourteen days to one year before ED visit    |         |
| Chronic respiratory disease (not asthma)   | No | <b>ICD-10:</b> J43.X, J44.X, J47.X, J60.X to J69.X, J70.X to J80.X, J81.X, J82.X, J83.X, J84.X, J92.X, J93.X, J94.X, J95.X, J96.X, J98.X, J99.X | Fourteen days to five years before ED visit  | Yes, No |
| Congenital malformations and abnormalities | No | <b>ICD-10:</b> All codes from Q00.X to Q99.X                                                                                                    | Fourteen days or more before ED visit        | Yes, No |
| Diabetes (type 1 or 2)                     | No | <b>ICD-10:</b> E10.X, E11.X                                                                                                                     | Fourteen days to five years before ED visit  | Yes, No |
| Immunocompromised state                    | No | <b>ATC:</b> H02AB.X (should be registered at least twice during the time period)                                                                | Fourteen days to half a year before ED visit | Yes, No |
|                                            |    | <b>ATC:</b> L01.X                                                                                                                               | Fourteen days to one year                    |         |

|                         |                                                                                                                                             |                                                 |              |
|-------------------------|---------------------------------------------------------------------------------------------------------------------------------------------|-------------------------------------------------|--------------|
|                         | <b>ATC:</b> L04.X                                                                                                                           | before ED visit                                 |              |
|                         | <b>ICD-10:</b> B20.X, B21.X, B22.X, B23.X, B24.X, D57.0, D57.1, D80.X, D81.X, D82.X, D83.X, D84.X, Z94.0, Z94.1, Z94.2, Z94.3, Z94.4, Z94.8 | Fourteen days to half a year before ED visit    |              |
|                         | <b>KVÅ:</b> DR04.1, DR04.2, DR04.4, DR04.6, DR04.7                                                                                          | Fourteen days or more before ED visit           |              |
|                         | <b>KVÅ:</b> H02AB.X (should be registered at least twice during the time period)                                                            | Fourteen days to three years before ED visit    |              |
|                         | <b>KVÅ:</b> L01.X                                                                                                                           | Fourteen days to half a year before ED visit    |              |
|                         | <b>KVÅ:</b> L04.X                                                                                                                           | Fourteen days to one year before ED visit       |              |
|                         |                                                                                                                                             | Fourteen days to half a year before ED visit    |              |
| Perinatal conditions    | <b>ICD-10:</b> All codes from P00.X to P96.X                                                                                                | Fourteen days or more before ED visit           | Yes, No      |
| Hospital length of stay | Number of days from hospital admission to hospital discharge                                                                                | Hospital admission to hospital discharge        | 0 to 35 days |
| High-flow nasal cannula | <b>KVÅ:</b> DG028                                                                                                                           | During ED visit, hospitalization or stay in ICU | Yes, No      |
| BiPAP, CPAP, or NIV     | <b>KVÅ:</b> DG001, DG007, DG023, DG027                                                                                                      | During ED visit, hospitalization or stay in ICU | Yes, No      |
| Mechanical ventilation  | <b>KVÅ:</b> DG021                                                                                                                           | During ED visit, hospitalization or stay in ICU | Yes, No      |



**Abbreviations:** ATC=Anatomical Therapeutic Chemical, BiPAP=Bilevel positive airway pressure, CPAP=continuous positive airway pressure, ED=Emergency department, ICD-10= International Statistical Classification of Diseases and Related Health Problems 10th Revision; ICU=Intensive care unit, KVÅ=Klassifikation av vårdåtgärder (Swedish for classification of healthcare procedures), NIV=Non-invasive ventilation
